# Supplementary material
Source: PubMed Central journal article supplement (PMC6168390)
Supplement: NIHMS1503184-supplement-2.pdf [file NIHMS1503184-supplement-2.pdf]

FIGURE S2

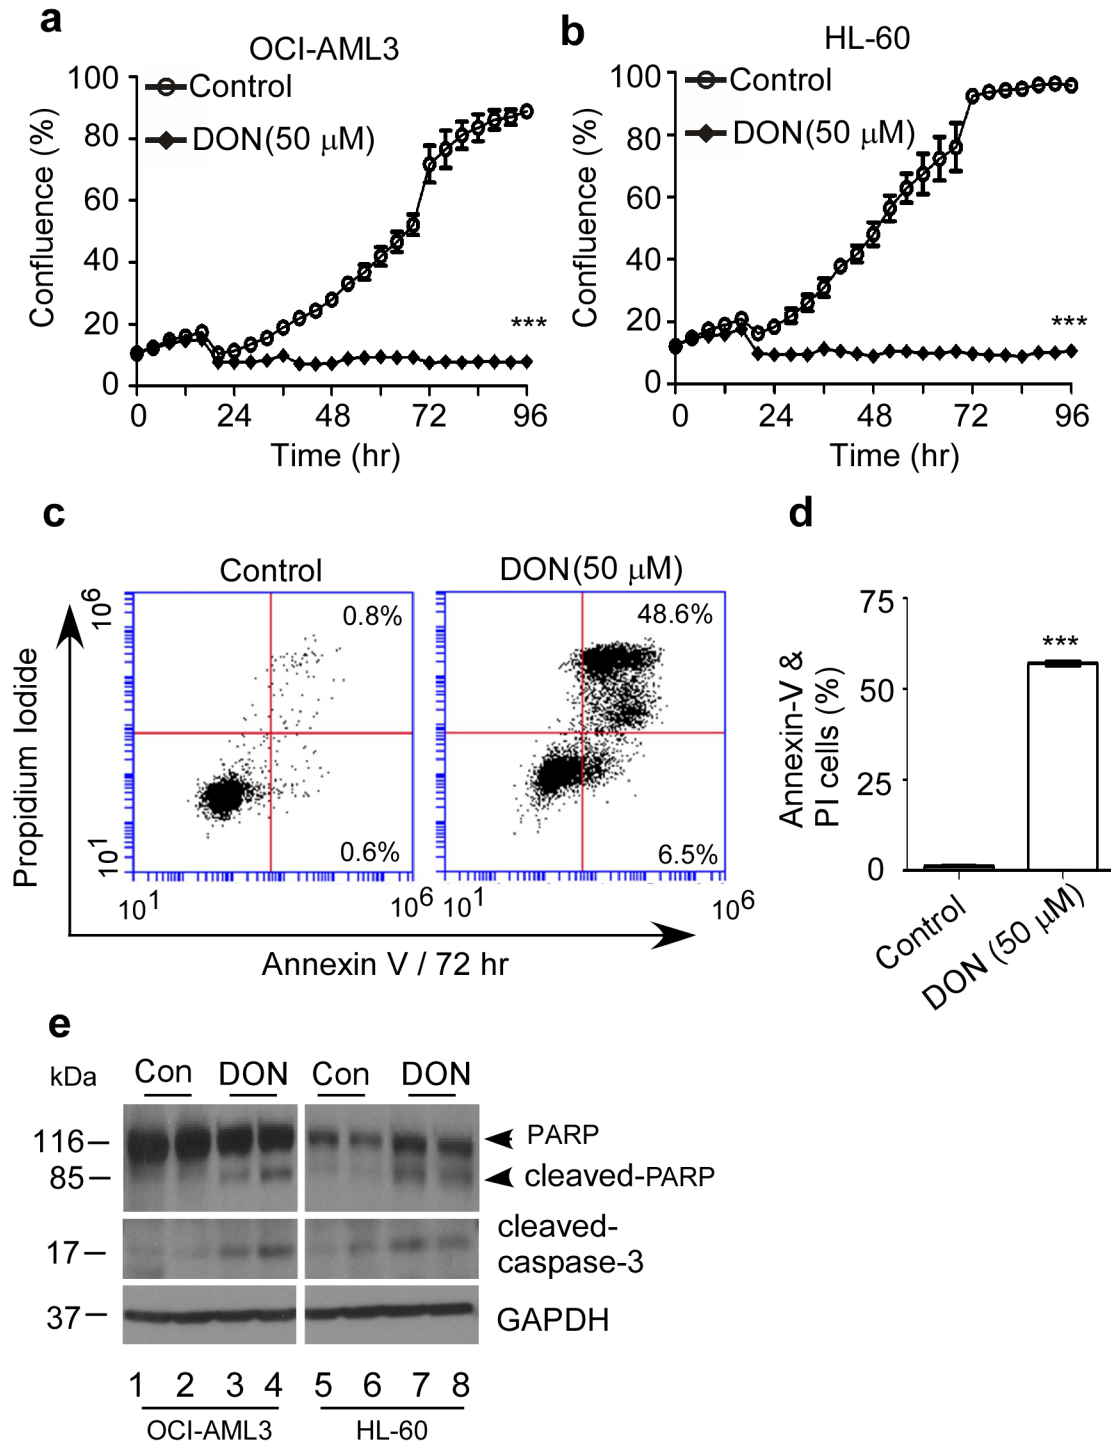

**Figure S2. DON reduces proliferation and induces apoptosis.**

Proliferation of (a) OCI-AML3 and (b) HL-60 cells treated with DON (50  $\mu$ M) or untreated control was monitored in an IncuCyte ZOOM by estimating cell confluence. (c) OCI-AML3 cells were treated with DON (50  $\mu$ M) for 72 hr and stained with Annexin V and propidium iodide (PI) to determine apoptotic cell population. (d) Graphical representation showing total population of early and late apoptotic cells under indicated treatment after 72 hr. Statistical significance was calculated using unpaired Student's t-test. N=3; \* $p$ <0.05, \*\* $p$ <0.01, \*\*\* $p$ <0.001. (e) Western blot analysis for apoptotic markers (cleaved-PARP and cleaved caspase-3) in untreated control (Con) or DON (50  $\mu$ M) treated OCI-AML3 and HL-60 cells, after 72 hr of incubation. GAPDH was used as an endogenous loading control.
