# Supplementary material
Source: PubMed Central journal article supplement (PMC6168390)
Supplement: NIHMS1503184-supplement-4.pdf [file NIHMS1503184-supplement-4.pdf]

FIGURE S4

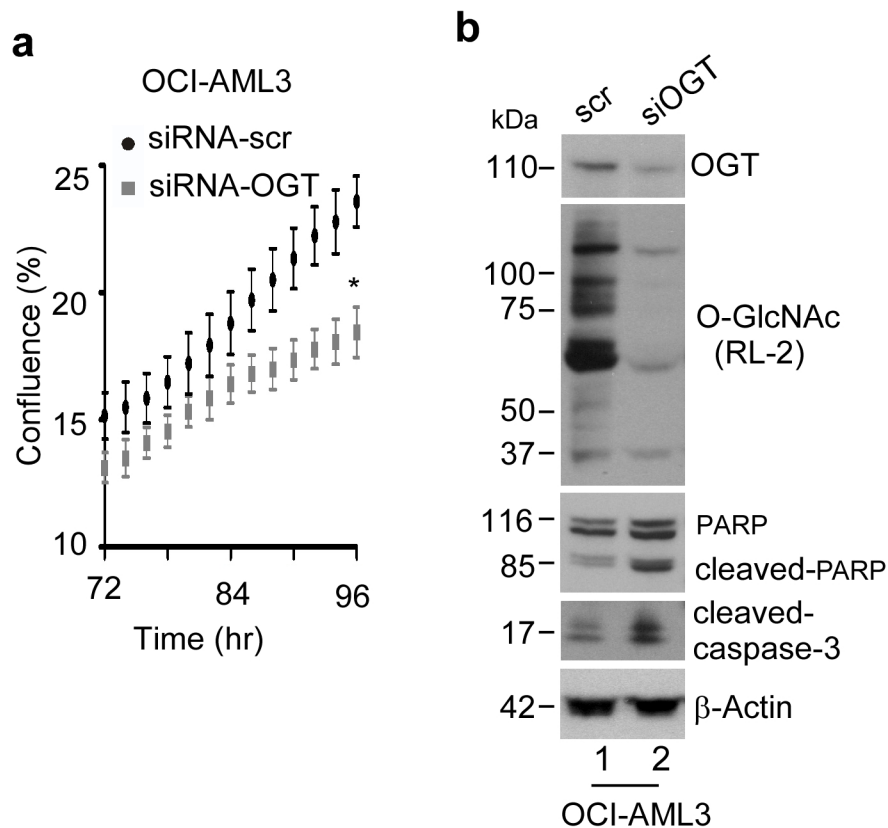

**Figure S4. siRNA mediated OGT silencing reduces proliferation and induce apoptosis.**

(a) OCI-AML3 transfected with scrambled siRNA or siRNA against OGT were plated after 48 hr to monitor cell proliferation. Cell proliferation was monitored in an IncuCyte ZOOM by estimating percent cell confluence up to 96 hr. (b) Western blot analysis of OCI-AML3 cells transfected with scrambled siRNA or siRNA against OGT. Levels of OGT, O-GlcNAcylation, cleaved-PARP and cleaved caspase-3 are shown 72 hr after siRNA transfection.
