# Supplementary material
Source: PubMed Central journal article supplement (PMC6168390)
Supplement: NIHMS1503184-supplement-6.pdf [file NIHMS1503184-supplement-6.pdf]

FIGURE S6

| CELL TYPE    | PARAMETER | UNIT       | CON                 | DON               | NORMAL RANGE |
|--------------|-----------|------------|---------------------|-------------------|--------------|
| LEUCOCYTES   | WBC       | K/ $\mu$ L | 2.84 $\pm$ 0.60     | 4.59 $\pm$ 0.28   | 1.8-10.7     |
|              | NE        | K/ $\mu$ L | 0.36 $\pm$ 0.00     | 1.45 $\pm$ 0.86   | 0.1-2.4      |
|              | LY        | K/ $\mu$ L | 2.33 $\pm$ 0.51     | 2.83 $\pm$ 0.56   | 0.9-9.3      |
|              | MO        | K/ $\mu$ L | 0.04 $\pm$ 0.00     | 0.14 $\pm$ 0.02   | 0-0.4        |
|              | EO        | K/ $\mu$ L | 0.08 $\pm$ 0.07     | 0.13 $\pm$ 0.05   | 0-0.2        |
|              | BA        | K/ $\mu$ L | 0.02 $\pm$ 0.01     | 0.03 $\pm$ 0.00   | 0-0.2        |
| ERYTHROCYTES | RBC       | M/ $\mu$ L | 6.77 $\pm$ 1.55     | 6.48 $\pm$ 0.52   | 6.36-9.42    |
|              | HB        | G/DL       | 10.06 $\pm$ 2.41    | 9.9 $\pm$ 1.9     | 11-15.1      |
|              | HCT       | %          | 31.46 $\pm$ 8.71    | 30.72 $\pm$ 2.54  | 35.1-45.4    |
|              | MCV       | FL         | 50.82 $\pm$ 2.48    | 56.88 $\pm$ 0.00  | 45.4-60.3    |
|              | MCH       | PG         | 16.28 $\pm$ 0.15    | 18.18 $\pm$ 2.12  | 14.1-19.3    |
|              | MCHC      | G/DL       | 35.36 $\pm$ 1.32    | 38.52 $\pm$ 4.41  | 30.2-34.2    |
|              | RDW       | %          | 18.09 $\pm$ 0.70    | 20.28 $\pm$ 0.00  | 12.4-27      |
| THROMBOCYTES | PLT       | K/ $\mu$ L | 395.45 $\pm$ 201.45 | 124.8 $\pm$ 72.97 | 592-2972     |
|              | MPV       | FL         | 5.06 $\pm$ 0.77     | 6.9 $\pm$ 0.25    | 5-20         |

**Figure S6. Hematological profile after In vivo DON administration.**

Normal C57BL mice were treated with 3 i.p. DON (0.65 mg/kg) doses or PBS (control), each with 3 day time interval difference. Mice were sacrificed 24 hr after last DON injection and hematological profile of C57BL mice treated with 3 i.p.DON was compared to control.
